# Supplementary material
Source: PubMed Central journal article supplement (PMC7487167)
Supplement: NIHMS1613281-supplement-1.pdf [file NIHMS1613281-supplement-1.pdf]

## Supplementary information for:

### **The N-terminal domain of *Staphylothermus marinus* McrB shares structural homology with PUA-like RNA binding proteins**

Christopher J. Hosford<sup>1</sup>, Myfanwy C. Adams<sup>1</sup>, Yiming Niu<sup>1</sup>, and Joshua S. Chappie<sup>1,\*</sup>

<sup>1</sup> Department of Molecular Medicine, Cornell University, Ithaca, NY, 14853, USA

\* To whom correspondence should be addressed. Tel: +1 (607) 253-3654; Fax: +1 (607) 253-3659; Email: [chappie@cornell.edu](mailto:chappie@cornell.edu)

#### **Supplementary Tables**

Supplementary Table 1. X-ray data collection and refinement statistics for Sm3-180.

Supplementary Table 2. Oligo nucleotide substrates used in filter binding.

#### **Supplementary Figures**

Supplementary Figure 1. PUA-like domain topologies.

**Supplementary Table 1. X-ray data collection and refinement statistics for Sm3-180.**

| <b>Data collection</b>                |                                                                                                                     |
|---------------------------------------|---------------------------------------------------------------------------------------------------------------------|
| PDB code                              | 6N0S                                                                                                                |
| X-ray Source                          | NECAT 24-ID-C                                                                                                       |
| Wavelength (Å)                        | 0.9791                                                                                                              |
| Space group                           | P4 <sub>3</sub> 2 <sub>1</sub> 2                                                                                    |
| Unit cell                             | $a = 62.41, b = 62.41, c = 118.63 \text{ \AA}$<br>$\alpha = 90.00^\circ, \beta = 90.00^\circ, \gamma = 90.00^\circ$ |
| Resolution, Å <sup>a</sup>            | 55.26 – 1.92 (2.09 – 1.92)                                                                                          |
| No. measured reflections <sup>a</sup> | 1224297 (199786)                                                                                                    |
| No. unique reflections <sup>a</sup>   | 29031 (8197)                                                                                                        |
| Completeness (%) <sup>a</sup>         | 99.9 (100.0)                                                                                                        |
| Multiplicity <sup>a</sup>             | 42.2 (24.4)                                                                                                         |
| R <sub>merge</sub> <sup>a</sup>       | 0.111 (1.068)                                                                                                       |
| Mean I/σ <sub>I</sub> <sup>a</sup>    | 19.9 (3.63)                                                                                                         |
| CC <sub>1/2</sub> <sup>a</sup>        | 0.999 (0.964)                                                                                                       |
| <b>Refinement</b>                     |                                                                                                                     |
| R <sub>work</sub> /R <sub>free</sub>  | 0.1964 / 0.2356                                                                                                     |
| RMSD                                  |                                                                                                                     |
| Bond lengths (Å)                      | 0.013                                                                                                               |
| Bond angles (°)                       | 1.029                                                                                                               |
| Ramachandran plot                     |                                                                                                                     |
| Favored (%)                           | 96.65                                                                                                               |
| Allowed (%)                           | 3.35                                                                                                                |
| Outliers (%)                          | 0.00                                                                                                                |
| Average B-Factor                      | 45.72                                                                                                               |
| Clashscore                            | 4.88                                                                                                                |
| No. Atoms                             |                                                                                                                     |
| Macromolecule                         | 1522                                                                                                                |
| Solvent                               | 94                                                                                                                  |
| Sulfate                               | 10                                                                                                                  |

<sup>a</sup> Parentheses indicate values for highest resolution shell

**Supplementary Table 2. Oligo nucleotide substrates used in binding experiments\*.**

| <b>Filter binding substrates</b> |                                                        |
|----------------------------------|--------------------------------------------------------|
| m <sup>6</sup> A ssRNA 7mer      | 5' -CGG (m <sup>6</sup> A) CUG-3'                      |
| nmA ssRNA 7mer                   | 5' -CGGACUG-3'                                         |
| m <sup>6</sup> A DNA US          | 5' -AGATCTA (m <sup>6</sup> A) CGTTAGAGCTT-3'          |
| m <sup>6</sup> A DNA LS          | 5' -TAAGCTCTA (m <sup>6</sup> A) CGTTAGATC-3'          |
| 5mC DNA US                       | 5' -AGATCTA (5mC) CGGTAGAGCTT-3'                       |
| 5mC DNA LS                       | 5' -TAAGCTCTA (5mC) CGGTAGATC-3'                       |
| nm DNA US                        | 5' -AGATCTAACGTTAGAGCTT-3'                             |
| nm DNA LS                        | 5' -TAAGCTCTAACGTTAGATC-3'                             |
| <b>MST substrates</b>            |                                                        |
| Rm6A DNA US                      | 5' - (6-FAM) ATCATCAG (m <sup>6</sup> A) TTCAGCGTAT-3' |
| Rm6A DNA LS                      | 5' -ATACGCTG (m <sup>6</sup> A) ATCTGATGAT-3'          |
| RA DNA US                        | 5' - (6-FAM) ATCATCAGATTCAGCGTAT-3'                    |
| RA DNA LS                        | 5' -ATACGCTGAATCTGATGAT-3'                             |
| Ym6A DNA US                      | 5' - (6-FAM) ATCATCAC (m <sup>6</sup> A) TTGAGCGTAT-3' |
| Ym6A DNA LS                      | 5' -ATACGCTC (m <sup>6</sup> A) ATGTGATGAT-3'          |
| YA DNA US                        | 5' - (6-FAM) ATCATCACATTGAGCGTAT-3'                    |
| YA DNA LS                        | 5' -ATACGCTCAATGTGATGAT-3'                             |
| Rm5C DNA US                      | 5' - (6-FAM) ATCATCAA (m <sup>5</sup> C) TGTAGCGTAT-3' |
| Rm5C DNA LS                      | 5' -ATACGCTA (m <sup>5</sup> C) AGTTGATGAT-3'          |
| RC DNA US                        | 5' - (6-FAM) ATCATCAACTGTAGCGTAT-3'                    |
| RC DNA LS                        | 5' -ATACGCTACAGTTGATGAT-3'                             |
| Ym5C DNA US                      | 5' - (6-FAM) ATCATCAT (m <sup>5</sup> C) TGAAGCGTAT-3' |
| Ym5C DNA LS                      | 5' -ATACGCTT (m <sup>5</sup> C) AGATGATGAT-3'          |
| YC DNA US                        | 5' -ATCATCATCTGAAGCGTAT-3'                             |
| YC DNA LS                        | 5' -ATACGCTTCAGATGATGAT-3'                             |

\* 'US' and 'LS' denote complementary 'upper strand' and 'lower strand' oligos that were annealed to make double stranded DNA substrates. All upper strand MST oligos are 5' end-labeled with 6-carboxyfluorescein (6-FAM). Underlined base denotes the nucleotide position adjacent to the modification site that is varied as either a purine (R) or pyrimidine (Y).

PSPTO5229 (PDB: 2eve)  
EVE domain

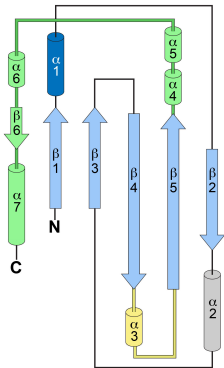

ZrMRB1 (PDB: 4u8t)  
YTH domain

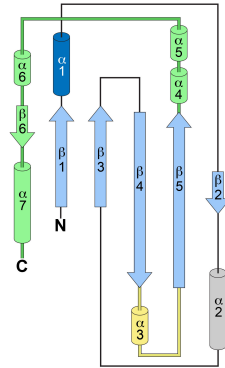

YTHDC1 (PDB: 4r3i)  
YTH domain

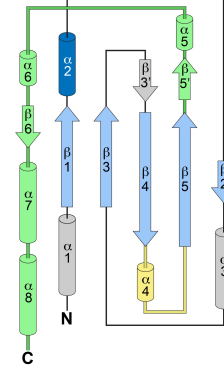

Tg McrB Δ185 (PDB: 6p0g)  
YTH domain

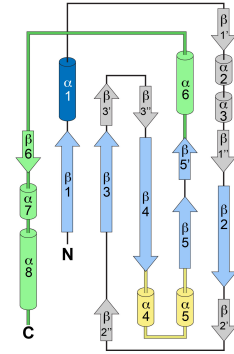

SmMcrB 3-180  
EVE domain

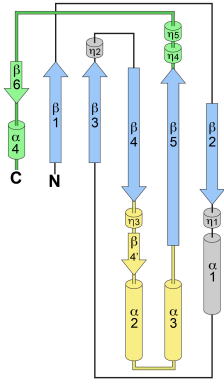

TTHA0113 (PDB: 2dp9)  
ASCH domain

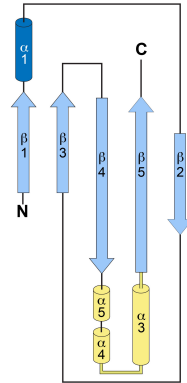

ArcTGT (PDB: 1j2b)  
PUA domain

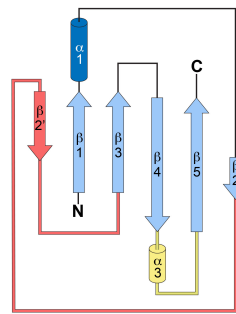

Mm UHRF1 (PDB: 2zkd, 3clz, 2zo)  
SRA domain

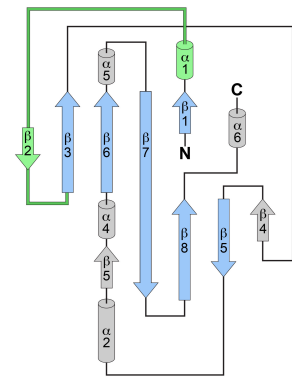

**Supplementary Figure 1. PUA-like domain topologies.** Topology diagrams of representative EVE, YTH, ASCH, PUA, and SRA domains. Secondary structure elements are colored according to the numbering and nomenclature established by Rost and colleagues (Bertonati et al., 2009): core 5-stranded pseudobarrel present in all folds, light blue; conserved  $\alpha$  helix between  $\beta 1$  and  $\beta 2$ , dark blue; Insert 0, red; Insert 1, yellow; Insert 2, green. Additional structural elements are colored gray. Spatially conserved segments in SRA domains are colored similarly.
